# Supplementary material
Source: PubMed Central journal article supplement (PMC11249196)
Supplement: JI_2400145_Supplemental_1.pdf [file JI_2400145_Supplemental_1.pdf]

Fig. S1

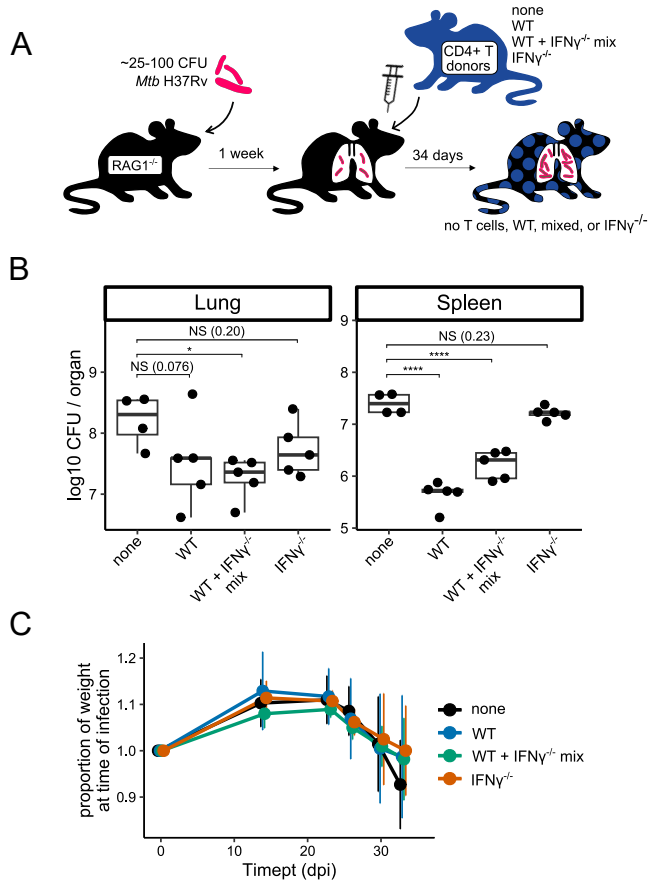

**Figure S1: Adoptively transferred IFN $\gamma$ <sup>-/-</sup> CD4+ T cells do not reduce *Mtb* burden, but do not affect tolerance to TB disease relative to WT T cells in *Rag1*<sup>-/-</sup> mice.**

(A) Schematic of adoptive transfer of zero or  $3 \times 10^6$  WT, 50/50% mixed, or IFN $\gamma$ <sup>-/-</sup> CD4+ T cells to *Rag1*<sup>-/-</sup> host mice after infection with aerosolized *Mtb*.

(B) Bacterial burden in lungs and spleens of *Mtb*-infected adoptive transfer mice at 34dpi. Results are representative of two independent experiments. Statistical significance was determined by Tukey's range test. \* $p \leq 0.05$ , \*\*\*\* $p \leq 0.0001$ .

(C) Weight trends of *Mtb*-infected adoptive transfer mice through 34dpi.

Fig. S2

A

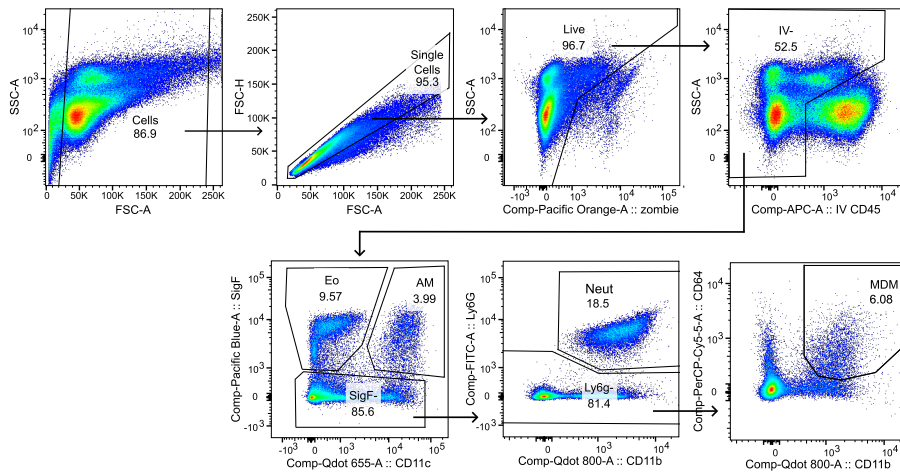

B

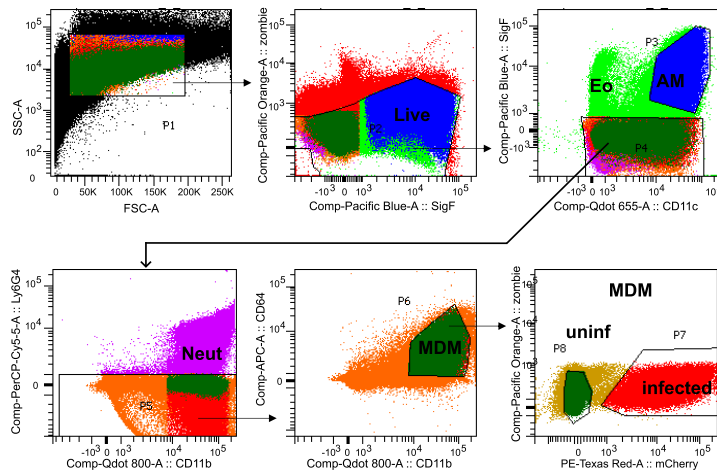

**Figure S2: Flow cytometry gating to identify myeloid subsets in lungs of *Mtb*-infected mice.**

T cell chimeric mice were infected with *Mtb* H37Rv-mCherry, IV-labeled, and harvested at 25dpi. Single cell suspensions from the right lung were stained with antibodies targeting myeloid cell subsets and gated as shown for flow cytometric analysis (A) and cell sorting prior to RNA-seq (B).

Fig. S3

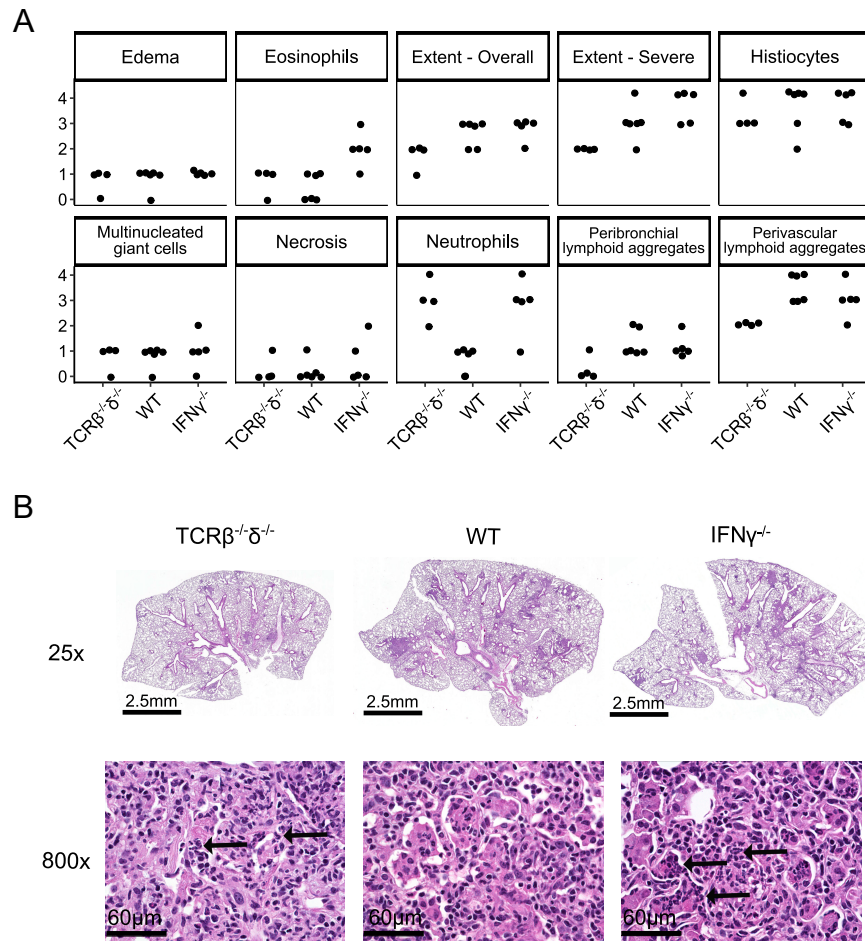

**Figure S3: Histopathologic scoring of representative sections of H&E stained lung sections from T cell chimeric mice infected with *Mtb*.**

(A) Histopathologic features assessed in sections of fixed and hematoxylin-eosin (H&E) stained lungs of T cell chimeric mice at 25dpi were scored by a pathologist blinded to T cell chimera genotype of each sample. Each dot represents one mouse.

(B) Representative images of sections of H&E stained lungs of T cell chimeric mice at 25dpi. Arrows represent neutrophilic infiltrates.

Fig. S4

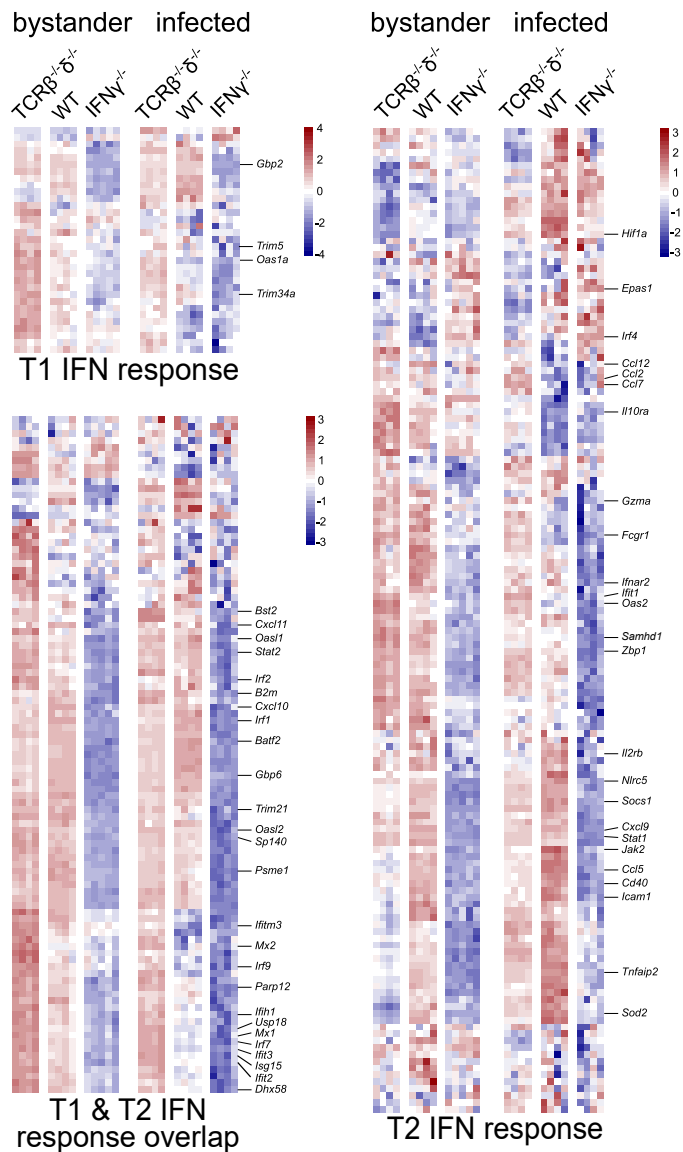

**Figure S4: IFNγ<sup>-/-</sup> T cells suppress both Type 1 and Type 2 interferon responses in monocyte-derived macrophages in T cell chimeric mice infected with *Mtb*.**

Row-normalized relative expression of Type 1 and 2 interferon-induced genes in FACS-sorted bystander and infected MDMs in lungs of T cell chimeric mice at 25dpi.
